# Supplementary material for: Reduced IL-17A levels in neonates born to mothers with diabetes mellitus or infection during pregnancy
Source: Front Pediatr. 2025 Aug 14;13:1658039. doi: 10.3389/fped.2025.1658039 (PMC12391099; doi:10.3389/fped.2025.1658039)
Supplement: Supplementary file 3 [file Table3.xlsx]

## Sheet: metadata
Sample_names	Group_names	Collect_date	PI	GDM	PD	GA	BW	IL_17a	WBC	Hb	Plt	LYM	Eos
CB039	DPC	2022.7	Yes	No	No	39	3.27	0.67	10.26	121.16	239.47	15.93	0.7121
CB055	DPC	2022.7	Yes	No	No	39	3.27	0.67	10.26	121.16	239.47	15.93	0.7121
CB112	DNPC	2022.7	No	No	No	NA	3.35	5.68	9.11	119	221.25	18.2	0.74
CB114	DNPC	2022.7	No	No	No	40	2.8	13.264	8.76	122	225	16.3	1.6
CB115	DNPC	2022.7	No	No	No	39	3.3	16.19	16.7	133	175	10.2	0.2
CB116	DNPC	2022.7	No	No	No	40	3.55	7.553	7.03	101	143	14.4	1.1
CB117	DNPC	2022.7	No	No	No	39	3.5	0.714	9.78	109	307	20.2	0.6
CB118	DNPC	2022.7	No	No	No	39	3.95	8.111	9.61	107	289	23	0.3
CB119	DNPC	2022.7	No	No	No	40	3.95	2.929	6.53	133	216	23.7	1.7
CB120	DNPC	2022.7	No	No	No	40	3.1	1.096	10.27	123	170	15.4	0.3
CB121	DNPC	2022.7	No	No	No	40	3.8	3.81	6.63	134	213	22.3	0.5
CB122	DNPC	2022.7	No	No	No	40	3.3	1.392	7.28	115	182	14	0.4
CB123	DNPC	2022.7	No	No	No	40	2.9	2.841	10.22	120	267	17.4	1.1
CB124	DNPC	2022.7	No	No	No	39	3.4	9.798	5.69	106	158	26.7	1.1
CB126	DPC	2022.7	No	Yes	No	40	3.15	4.405	9.62	132	276	20.6	0.2
CB127	DNPC	2022.7	No	No	No	39	3.15	20.163	8.17	115	282	20.8	0.7
CB128	DNPC	2022.7	No	No	No	38	2.85	20.68	8.97	107	173	16.5	0.4
CB129	DPC	2022.7	Yes	No	No	40	3.55	8.876	9.02	136	196	12.5	0.6
CB131	DNPC	2022.7	No	No	No	40	3.2	0.741	10.02	124	245	16.8	0.4
CB133	DNPC	2022.7	No	No	No	39	3.3	0.972	11.08	118	226	12.9	0.8
CB134	DNPC	2022.7	No	No	No	40	3.6	72.66	9.05	137	269	20.6	0.6
CB199	DPC	2022.7	Yes	No	No	40	3.05	2.415	13.8	106	276	14.1	1.6
CB200	DPC	2022.7	Yes	No	No	38	2.7	5.963	8.65	134	211	14.9	0.6
CB201	DPC	2022.7	Yes	No	No	39	3.55	0.741	13.98	111	129	7.4	0.1
CB202	DPC	2022.7	Yes	No	No	41	3.55	0.177	9.51	120	162	16.9	0.7
CB203	DPC	2022.7	Yes	No	No	41	3.5	11.734	8.51	124	262	15.7	0.5
CB205	DPC	2022.7	No	Yes	No	36	2.7	6.076	7.71	120	145	14.9	0.3
CB206	DPC	2022.7	Yes	No	No	35	2.1	0.714	14.87	150	309	19.6	0.5
CB208	DPC	2022.7	No	Yes	No	39	3.5	5.963	12.58	133	183	20.8	0.6
CB209	DPC	2022.7	Yes	No	No	39	3.6	0.634	10.24	115	181	17.6	0.5
CB210	DPC	2022.7	Yes	No	No	39	3.1	0.37	14.72	119	244	7	0
CB211	DPC	2022.7	No	Yes	No	39	3.5	0.061	9.79	119	250	7.5	1.63
CB212	DPC	2022.7	No	Yes	No	37	2.75	0.05	5.69	116	213	18	1.1
CB213	DPC	2022.7	No	Yes	No	39	3.75	0.061	8.96	116	274	16.5	1.1
CB214	DPC	2022.7	Yes	No	No	38	3.05	0.061	9.25	102	277	16.5	0.5
CB215	DPC	2022.7	No	Yes	No	39	3.35	0.086	6.45	121	263	31.5	1.6
CB216	DPC	2022.7	Yes	No	No	37	2.9	0.484	13.26	117	407	10.8	0.1
CB217	DPC	2022.7	No	Yes	No	39	3.25	1.823	8.26	111	292	19.9	1.3
CB001D	VNPC	2023.3	No	No	No	40	3	0.287	7.56	124	227	21.8	1.5
CB002D	VPC	2023.3	No	Yes	No	39	3.55	1.324	8.78	97	325	17	0.7
CB003D	VNPC	2023.3	No	No	No	39	3.55	0.194	15.03	123	248	20	1.7
CB004D	VNPC	2023.3	No	No	No	39	3.55	0.267	10.8	87	226	15	0.4
CB005D	VNPC	2023.3	No	No	No	40	3.85	0.129	10.74	109	352	24.7	1.2
CB006D	VNPC	2023.3	No	No	No	40	3.45	0.687	7.74	115	232	21.1	0
CB007D	VPC	2023.3	No	Yes	No	39	3.85	0.825	9.79	111	236	17.6	0.8
CB008D	VPC	2023.3	No	Yes	No	40	3.2	1.128	6.05	130	234	30.4	0.3
CB009D	VPC	2023.3	No	Yes	No	38	3.65	0.37	8.46	104	274	16.7	1.2
CB010D	VNPC	2023.3	No	No	No	39	3.35	1.567	6.61	114	205	25.9	1.1
CB011D	VNPC	2023.3	No	No	No	40	2.75	5.353	10.62	113	225	16.4	0.3
CB012D	VPC	2023.3	No	Yes	No	39	4.05	0.532	6.27	120	196	22.3	1.1
CB013D	VPC	2023.3	No	Yes	No	39	2.75	0.532	7.92	116	188	13.6	0.9
CB014D	VNPC	2023.3	No	No	No	40	3.2	0.211	10.23	97	259	15.4	3.7
CB015D	VNPC	2023.3	No	No	No	39	3.45	2.132	11.01	122	288	18.4	0.8
CB016D	VNPC	2023.3	No	No	No	39	3.65	2.132	7.9	133	183	20.9	1.1
CB017D	VPC	2023.3	Yes	No	No	39	3.2	1.496	12.4	112	299	10.2	0.1
CB018D	VPC	2023.3	No	Yes	No	40	3.8	3.244	8.22	132	166	24.1	1.2
CB019D	VNPC	2023.3	No	No	No	40	3.35	9.933	15.07	100	165	9.2	0
CB020D	VPC	2023.3	No	Yes	No	40	3.3	1.531	10.61	112	325	21.1	0.7
CB021D	VNPC	2023.3	No	No	No	37	2.7	7.861	10.8	98	265	21.3	0.3
CB022D	VNPC	2023.3	No	No	No	39	3.25	18.889	2.11	3.79	125	19	0.4
CB023D	VNPC	2023.3	No	No	No	39	3.35	1.225	9.11	94	259	26.1	0.4
CB024D	VNPC	2023.3	No	No	No	40	2.7	4.355	7.42	122	315	16.3	0.9
CB025D	VNPC	2023.3	No	No	No	41	3.05	0.972	7.2	115	276	22.2	0.7
CB026D	VNPC	2023.3	No	No	No	39	3.25	5.85	6.61	109	158	33.7	0.5
CB027D	VNPC	2023.3	No	No	No	40	3.5	1.461	14.39	96	185	16.3	0.6
CB028D	VPC	2023.3	No	Yes	No	40	2.95	1.899	8.72	135	211	22.9	1.3
CB029D	VPC	2023.3	No	Yes	No	37	3	0.66	8.71	122	238	30	1.7
CB030D	VNPC	2023.3	No	No	No	41	3.1	0.913	8.11	136	247	16.6	0.5
CB031D	VNPC	2023.3	No	No	No	40	3.45	0.913	9.6	111	271	15.1	0.3
CB032D	VPC	2023.3	Yes	No	No	38	2.6	2.668	9.17	135	237	26.4	0.2
CB033D	VNPC	2023.3	No	No	No	40	3.5	2.885	9.59	122	248	30.3	1.8
CB034D	VPC	2023.3	No	Yes	No	37	2.95	1.065	12.15	114	230	15.3	0.7
CB035D	VPC	2023.3	No	Yes	No	38	2.85	0.532	7.36	107	149	23	0.8
CB036D	VPC	2023.3	Yes	No	No	40	3.1	1.034	5.96	127	287	20.3	0.3
CB037D	VNPC	2023.3	No	No	No	40	3.25	2.252	7.38	99	198	23.3	2.2
CB038D	VNPC	2023.3	No	No	No	40	3.2	25.071	6.53	98	239	34.2	0.9
CB039D	VPC	2023.3	No	Yes	No	39	3.6	2.457	13.75	116	305	19	0.3
CB040D	VNPC	2023.3	No	No	No	39	3.15	4.977	12.29	97	156	12.2	0.2
CB041D	VNPC	2023.3	No	No	No	39	3.45	2.053	8.7	122	180	20	0.6
CB043D	VPC	2023.3	No	Yes	No	38	3.15	0.557	12.21	126	285	11.7	0.7
CB047D	VPC	2023.3	Yes	No	No	38	3.35	0.687	9.42	127	228	20.2	0.8
CB056D	VPC	2023.3	No	Yes	No	40	3.6	0.287	7.26	134	250	18.3	0.3
CB057D	VPC	2023.3	Yes	No	No	39	3.4	8.111	14.43	115	222	12.5	0.6
CB060D	VPC	2023.3	Yes	No	No	38	2.95	0.797	10.67	122	267	21.4	0.7
CB068D	VPC	2023.3	No	Yes	No	39	3.4	0.825	8.85	112	270	33.1	0.2
CB069D	VPC	2023.3	Yes	No	No	40	3.25	0.532	7.75	119	179	22.6	0.9
CB071D	VPC	2023.3	No	Yes	No	40	3.25	1.034	8.98	107	193	13.6	0.3

## Sheet: IL-17 ELISA kit Test Result
Human IL17A (IL-17A) IL17 ELISA Kit Test Results
Dilution （pg/ml ）	250	125	62.5	31.25	15.625	7.8125	3.90625	control
A450nm	3.027	1.85	1.251	0.937	0.66	0.392	0.298	0.112
	2.915	1.738	1.139	0.825	0.548	0.28	0.186	0
Sample （pg/ml ）	250	125	62.5	31.25	15.625	7.8125	3.90625	0
